# Supplementary material for: Shuffling the yeast genome using CRISPR/Cas9-generated DSBs that target the transposable Ty1 elements
Source: PLoS Genet. 2023 Jan 26;19(1):e1010590. doi: 10.1371/journal.pgen.1010590 (PMC9879454; doi:10.1371/journal.pgen.1010590)
Supplement: S3 Data — (XLSX) [file pgen.1010590.s029.xlsx]

## Sheet: Dataset S3.1
Dataset S3.1. Aneuploid events in isolates grown on 2% galactose solid medium for 4 days
Strain name	Chromosome	Event type	Aneuploidy class
MD741-3	I	MONO	a2
MD741-7	XV	UPD	b1
MD741-8	XV	MONO	a1
MD741-9	VII	UPD	b1
MD741-11	VIII	MONO	a1
MD741-11	XV	MONO	a1
MD741-12	XV	MONO	a1
MONO=monosomy. TRI=trisomy. UPD=uniparental disomy (lost of one homolog and the duplication of the other). The various classes of aneuploid are shown in Dataset S3.2

## Sheet: Dataset 3.2
Dataset S3.2. Depictions of various classes of aneuploids.*
Event type	Class	Pattern			Number of events (Dataset S3.1)	Number of events (Dataset S3.3)
Monosomy (MONO)
	a1				4	7
	a2				1	5
Uniparental disomy (UPD)
	b1				2	1
	b2				0	1
Trisomy (TRI)
	c1				0	1
	c2				0	0
*In this table, we depict the patterns of aneuploidy events. The various classes are specified in lower case letters and numbers in both Dataset S3-1 and S3-3. Classes a1-a2 represent monosomy events (loss of one copy of an entire chromosome in diploids). Classes b1-b2 are uniparental disomy event (two copies of one parental homolog and none of the other). Classes c1-c2 represent trisomy events (…

## Sheet: Dataset 3.3
Dataset S3.3. Aneuploid events in isolates grown in 2% galactose liquid medium for 2-4 h.
Strain name	Chromosome	Event type	Aneuploidy class
MD704-2h-1	III	MONO	a1
MD704-2h-2	III	MONO	a2
MD704-2h-2	X	MONO	a2
MD704-2h-4	I	MONO	a2
MD704-2h-4	II	MONO	a1
MD704-2h-4	X	MONO	a1
MD704-2h-6	XV	MONO	a1
MD704-2h-25	III	MONO	a1
MD704-2h-26	IV	MONO	a2
MD704-4h-1	III	MONO	a1
MD704-4h-3-1	III	MONO	a1
MD704-4h-3-2	III	UPD	b1
MD704-4h-3-2	VII	UPD	b2
MD704-4h-3-2	XIV	TRI	c1
MD704-4h-3-4	II	MONO	a2
MONO=monosomy. TRI=trisomy. UPD=uniparental disomy.
